# Supplementary material
Source: Research Square preprint supplement (doi:10.21203/rs.3.rs-9374449/v1)
Supplement: Supplementary file 1 [file 0b56285f545439b9435ede40.docx]

Supplemental Material

**Noninvasive Imaging of Myeloid Cell Dynamics: GPR84 PET Differentiates EAE and Tracks Therapy Response**

Samantha T. Reyes1, Renesmee C. Kuo2, Isaac M. Jackson1, Mausam Kalita1, Piper Mahn1, Spencer Mak1, Mira Sundar1, Bo Zhang1, Jonathan Green1, Hui-Wen Chan1, Desiree D’Moore1, Nidhi Srikantam1, Poorva Jain1, Andrew Setiadi1, Sydney C. Nagy1, Tahlia Wu1, Emily M. Deal1, Gayatri Gowrishankar1, Graeme Milligan3, Michelle L. James1,4*

*1Department of Radiology, Stanford University, Stanford, CA, USA, 2Department of Electrical Engineering, Stanford University, Stanford, CA, USA, 3Centre for Translational Pharmacology, School of Molecular Biosciences, College of Medical, Veterinary and Life Sciences, University of Glasgow, Glasgow G128QQ, Scotland, U.K.,4Department of Neurology and Neurological Sciences, Stanford University, Stanford, CA, USA*

**Correspondence:*

*Michelle L. James*

*mljames@stanford.edu*

**Table S1.** N for eah group for qPCR of spinal cords

|  | Bulk | CD11b enrichment |
| --- | --- | --- |
| EAE | 10 | 8 |
| Naive | 5 | 6 |

**Table S2.** N for each group for dynamic PET for spinal cord

|  | 11C -MGX-38 | 18F-MGX-110S |
| --- | --- | --- |
| High EAE | 11 | 3 |
| Naive | 4 | 3 |

**Table S3.** N for each group for dynamic PET for brain stem

|  | 11C-MGX-38 | 18F-MGX-110S |
| --- | --- | --- |
| High EAE | 3 | 3 |
| Naive | 3 | 3 |

**Table S4.** N for each group for static PET for spinal cord

|  | 11C-MGX-38 | 18F-MGX-110S |
| --- | --- | --- |
| High EAE | 15 | 8 |
| Low EAE | 10 | 5 |
| Naive | 11 | 16 |
| Veh-EAE | 5 | 4 |
| Tx EAE | 6 | 5 |

**Table S5.** N for each group for *ex vivo* gamma counting separated by organ

|  | 11C-MGX-38 | | | | | 18F-MGX-110S | | | | |
| --- | --- | --- | --- | --- | --- | --- | --- | --- | --- | --- |
|  | High EAE | Low EAE | Naive | Veh-EAE | Tx EAE | High EAE | Low EAE | Naive | Veh-EAE | Tx EAE |
| LSC | 16 | 12 | 13 | 5 | 8 | 7 | 8 | 12 | 4 | 5 |
| TSC | 15 | 12 | 12 | 5 | 7 | 7 | 7 | 12 | 4 | 5 |
| Brain | 12 | 12 | 12 | 5 | 6 | 7 | 8 | 12 | 4 | 5 |
| Adipose | 14 | 12 | 12 | 5 | 7 | 7 | 8 | 12 | 4 | 5 |
| Spleen | 15 | 12 | 12 | 5 | 7 | 7 | 8 | 12 | 4 | 5 |
| Muscle | 15 | 12 | 12 | 5 | 7 | 7 | 8 | 12 | 4 | 5 |
| Bone Marrow | 13 | 12 | 12 | 5 | 7 | 7 | 8 | 11 | 4 | 4 |
| Blood | 15 | 12 | 12 | 5 | 7 | 7 | 8 | 11 | 4 | 5 |

**Table S6.** Plasma free fraction (fp) of GPR84-PET radiotracers

| 11C-MGX-38 | 18F-MGX-110S |
| --- | --- |
| 16.16 ± 4.06 | 42.36 ± 0.69 |

**Figure S1. Both radiotracers cross the BBB with fast kinetics.** 11C-MGX-38 (left) exhibits a higher peak and slower washout of the brain stem compared to 18F-MGX-110S (right).

**Figure S2. 18F-MGX-110S is more sensitive to peripheral signal to effects of fingolimod treatment than 11C-MGX-38. A)** 11C-MGX-38 does not show a statistical difference in peripheral immune activation except when comparing treated to vehicle mice. Statistics calculated with ordinary one-way ANOVA or Welch’s t test (treatment studies). **B)** 18F-MGX-110S shows statistically significant differences in signal for all peripheral regions measured in all mouse cohorts. Statistics were calculated with Brown-Forsythe and Welch ANOVA test or Welch’s t test (treatment studies). *p<0.05, **p<0.01, ***p<0.001, ****p<0.0001.

**Figure S3.** Ex vivo gamma counting of peripheral organs with high radiotracer signal.
