# Supplementary material
Source: Research Square preprint supplement (doi:10.21203/rs.3.rs-9374449/v1)
Supplement: Supplementary file 2 [file 825b034cf6f543b28fbdf6f7.docx]

**Schematic 1. Proposed involvement of GPR84 in multiple sclerosis.** G protein-coupled receptor 84 (GPR84) is expressed on myeloid lineage cells, predominantly microglia and macrophages, and is upregulated under inflammatory conditions, making it a biomarker of pro-inflammatory innate immune activation. Upon binding of medium-chain fatty acids (MCFAs), GPR84 amplifies inflammatory signaling in neuroinflammatory CNS diseases, including MS. Key downstream effects include inhibition of cyclic adenosine monophosphate (cAMP) production, which promotes NLRP3 inflammasome assembly, and activation of the ERK1/2 pathway, collectively driving cytokine release. This inflammatory cycle promotes recruitment of immune cells to sites of injury, such as demyelinating lesions, thereby contributing to disease progression and chronic neuroinflammation.
